# Supplementary material for: Oxyresveratrol Induces Autophagy via the ER Stress Signaling Pathway, and Oxyresveratrol-Induced Autophagy Stimulates MUC2 Synthesis in Human Goblet Cells
Source: PubMed Central journal article supplement (PMC7139292; doi:10.3390/antiox9030214), 2020-03-05
Supplement: antioxidants-09-00214-s001.pdf [file antioxidants-09-00214-s001.pdf]

## Supplementary materials

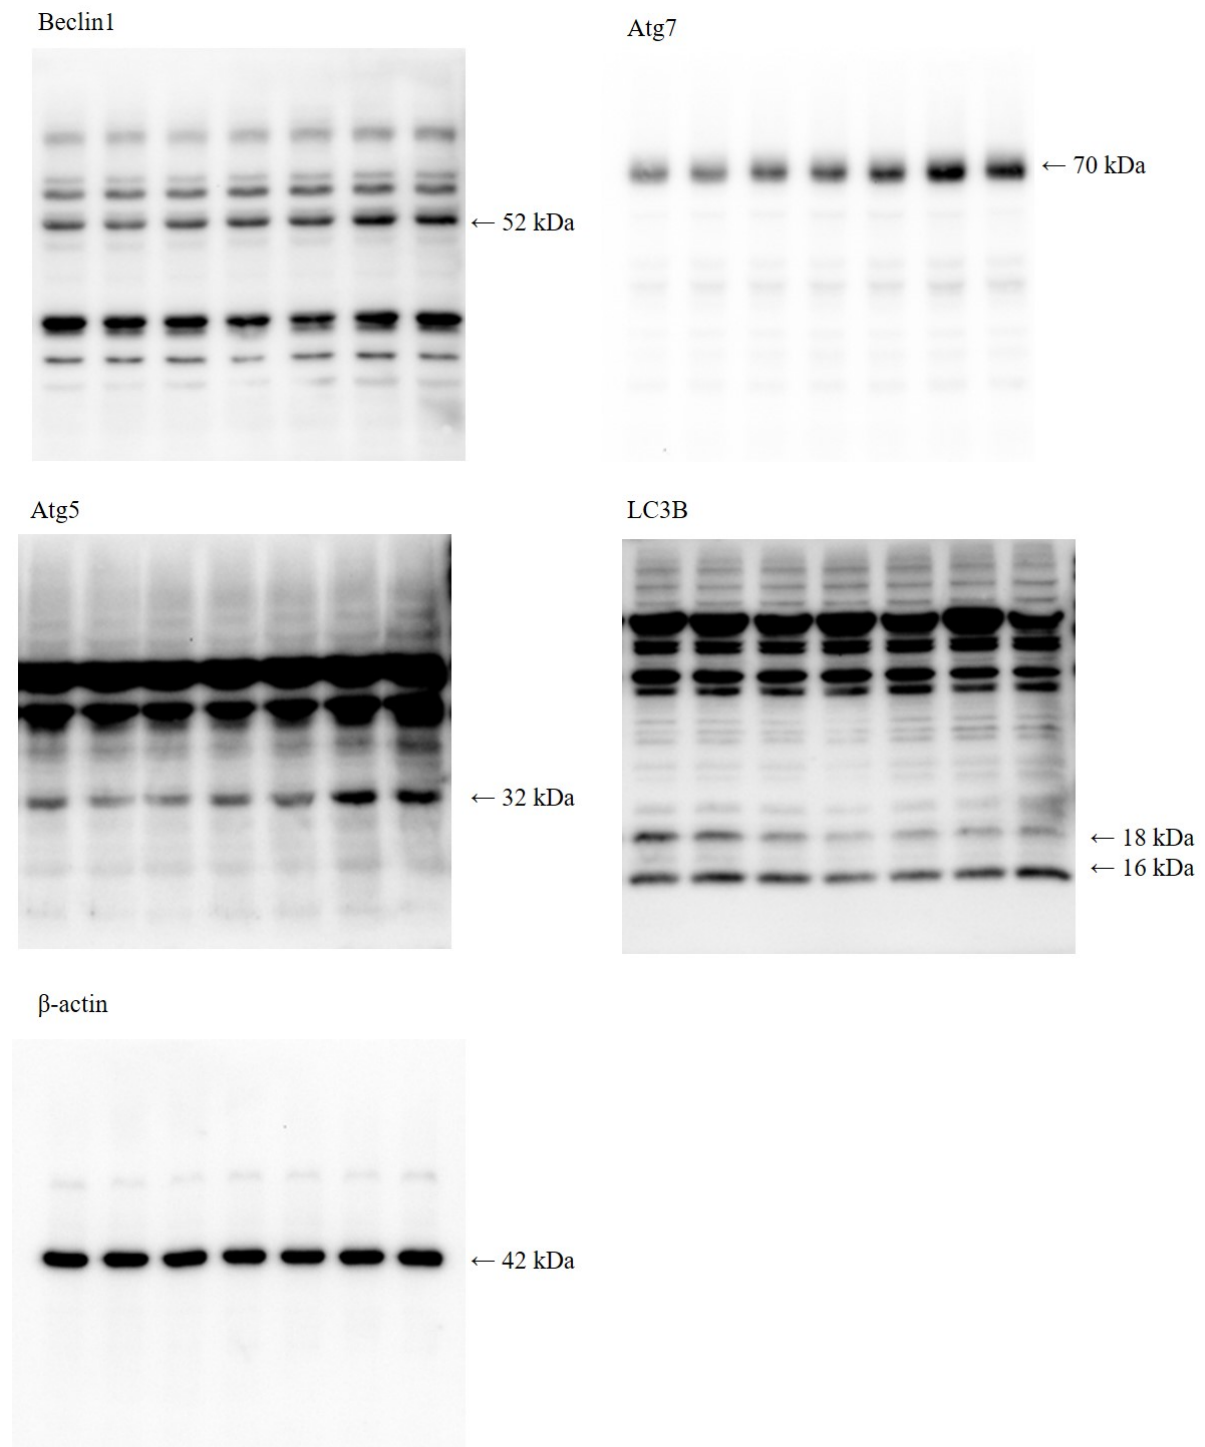

**Figure S1.** Western blot data. The full-length blots of Figure 2A.

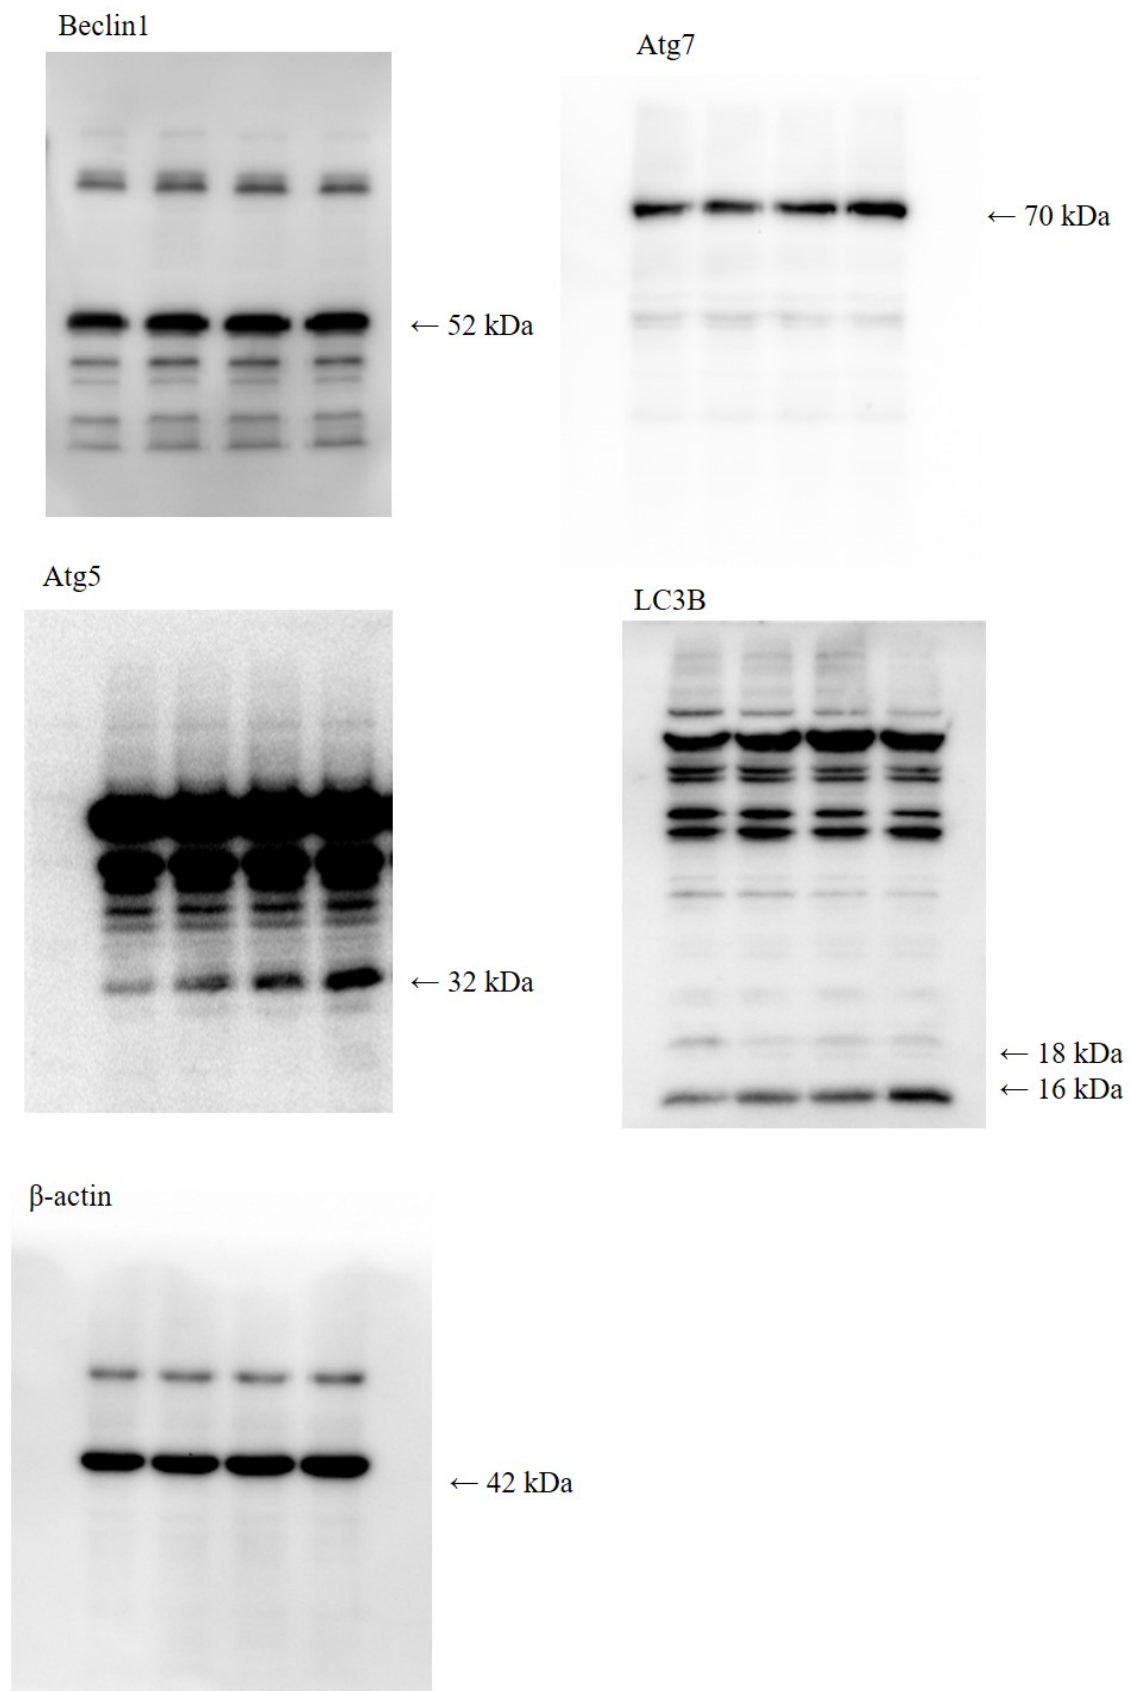

**Figure S2.** Western blot data. The full-length blots of Figure 3C.

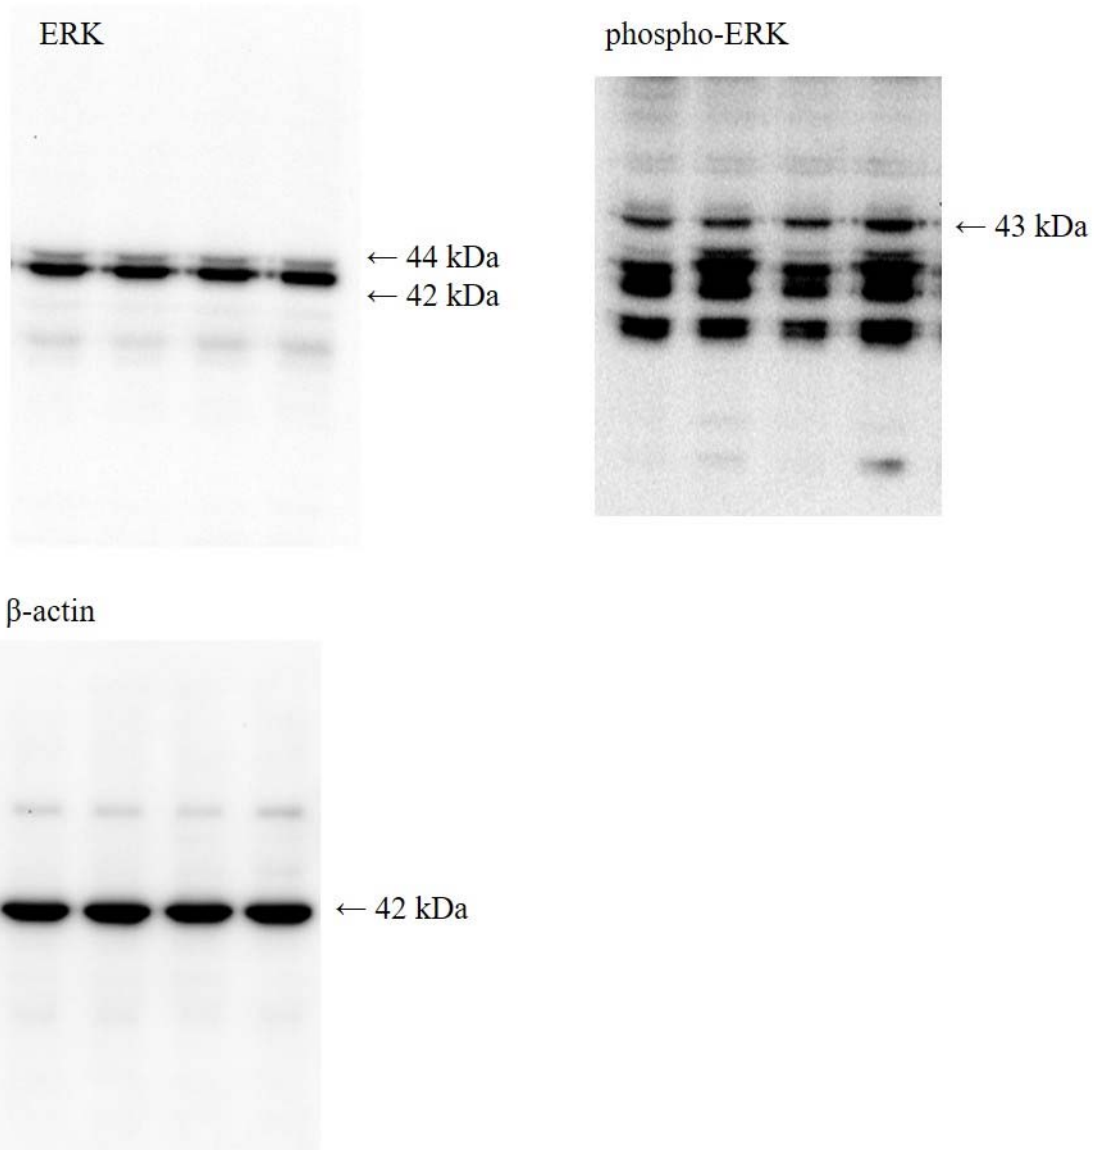

**Figure S3.** Western blot data. The full-length blots of Figure 6B.

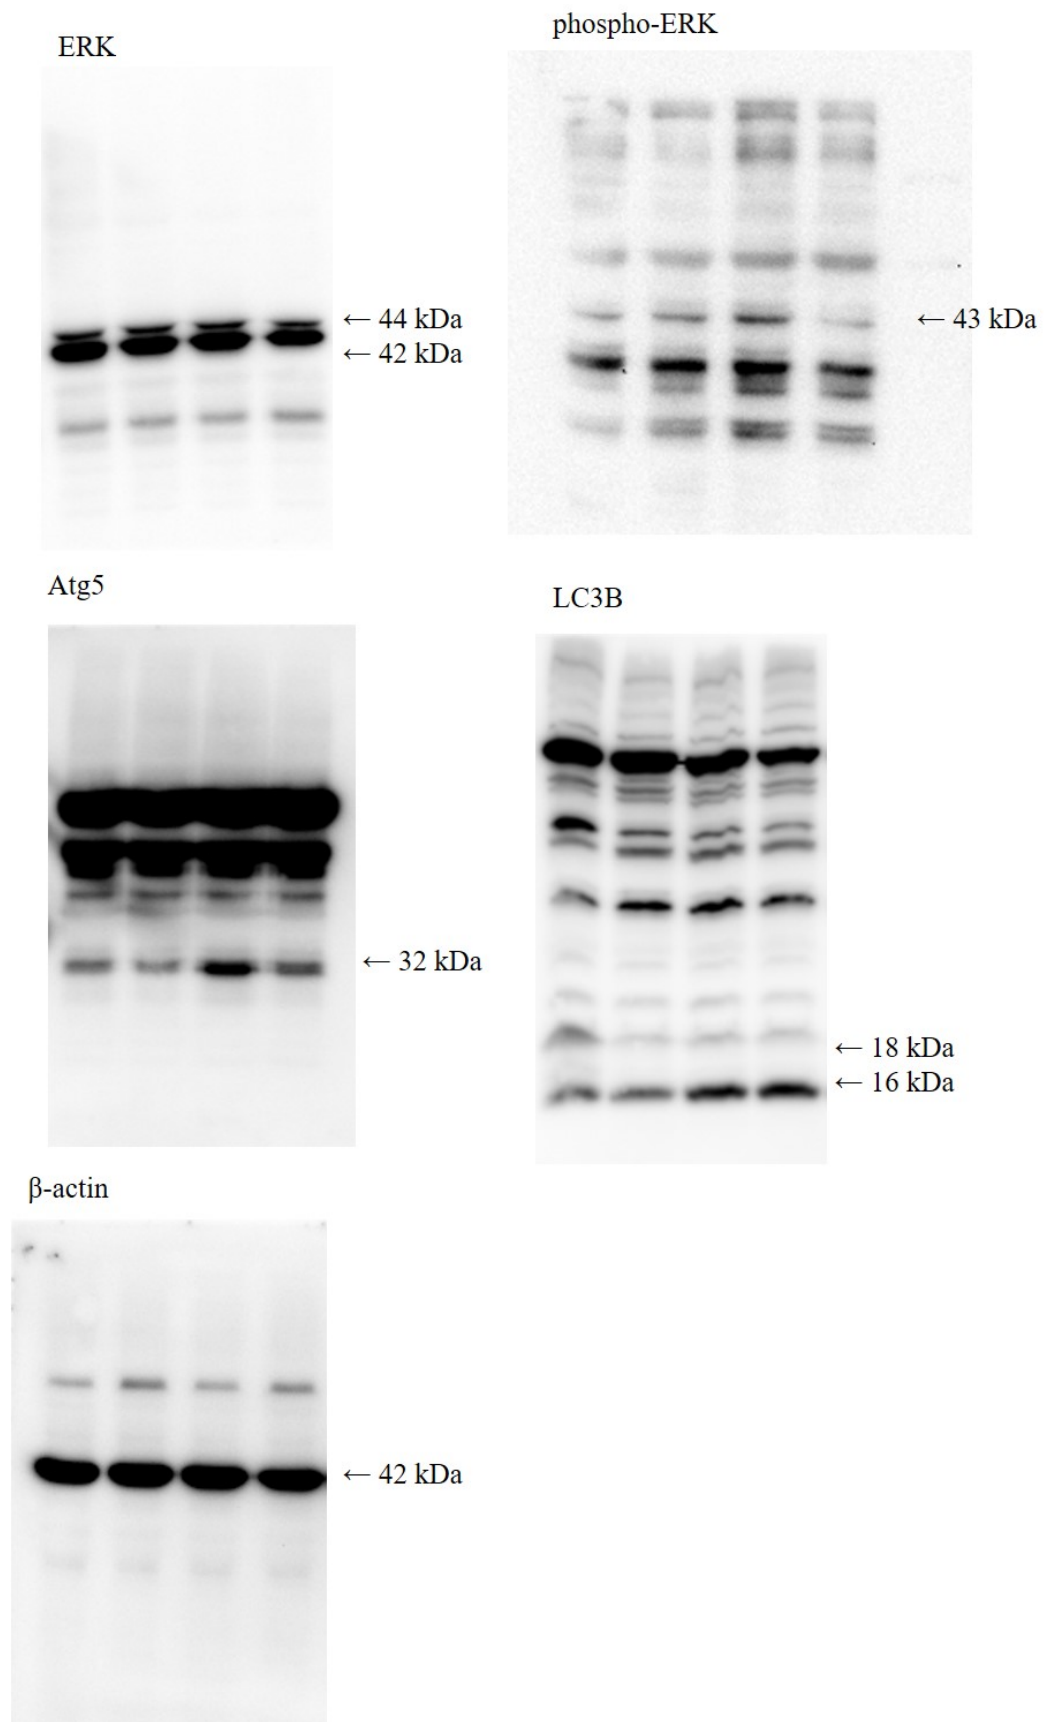

**Figure S4.** Western blot data. The full-length blots of Figure 6D.

IRE1 $\alpha$

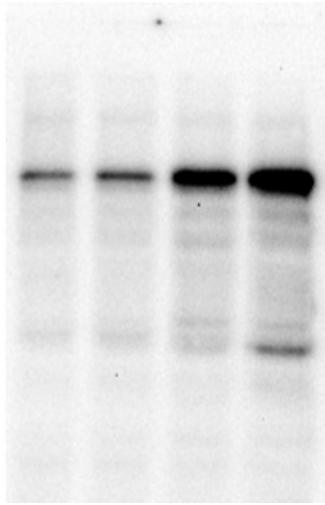

← 120 kDa

$\beta$ -actin

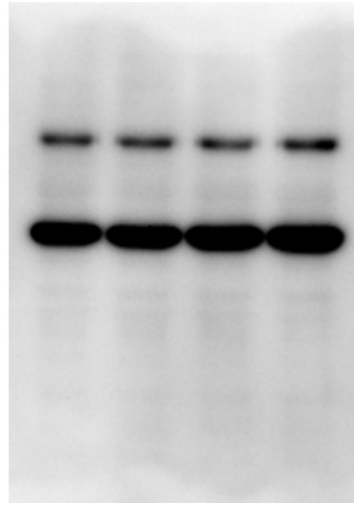

← 42 kDa

**Figure S5.** Western blot data. The full-length blots of Figure 7C.

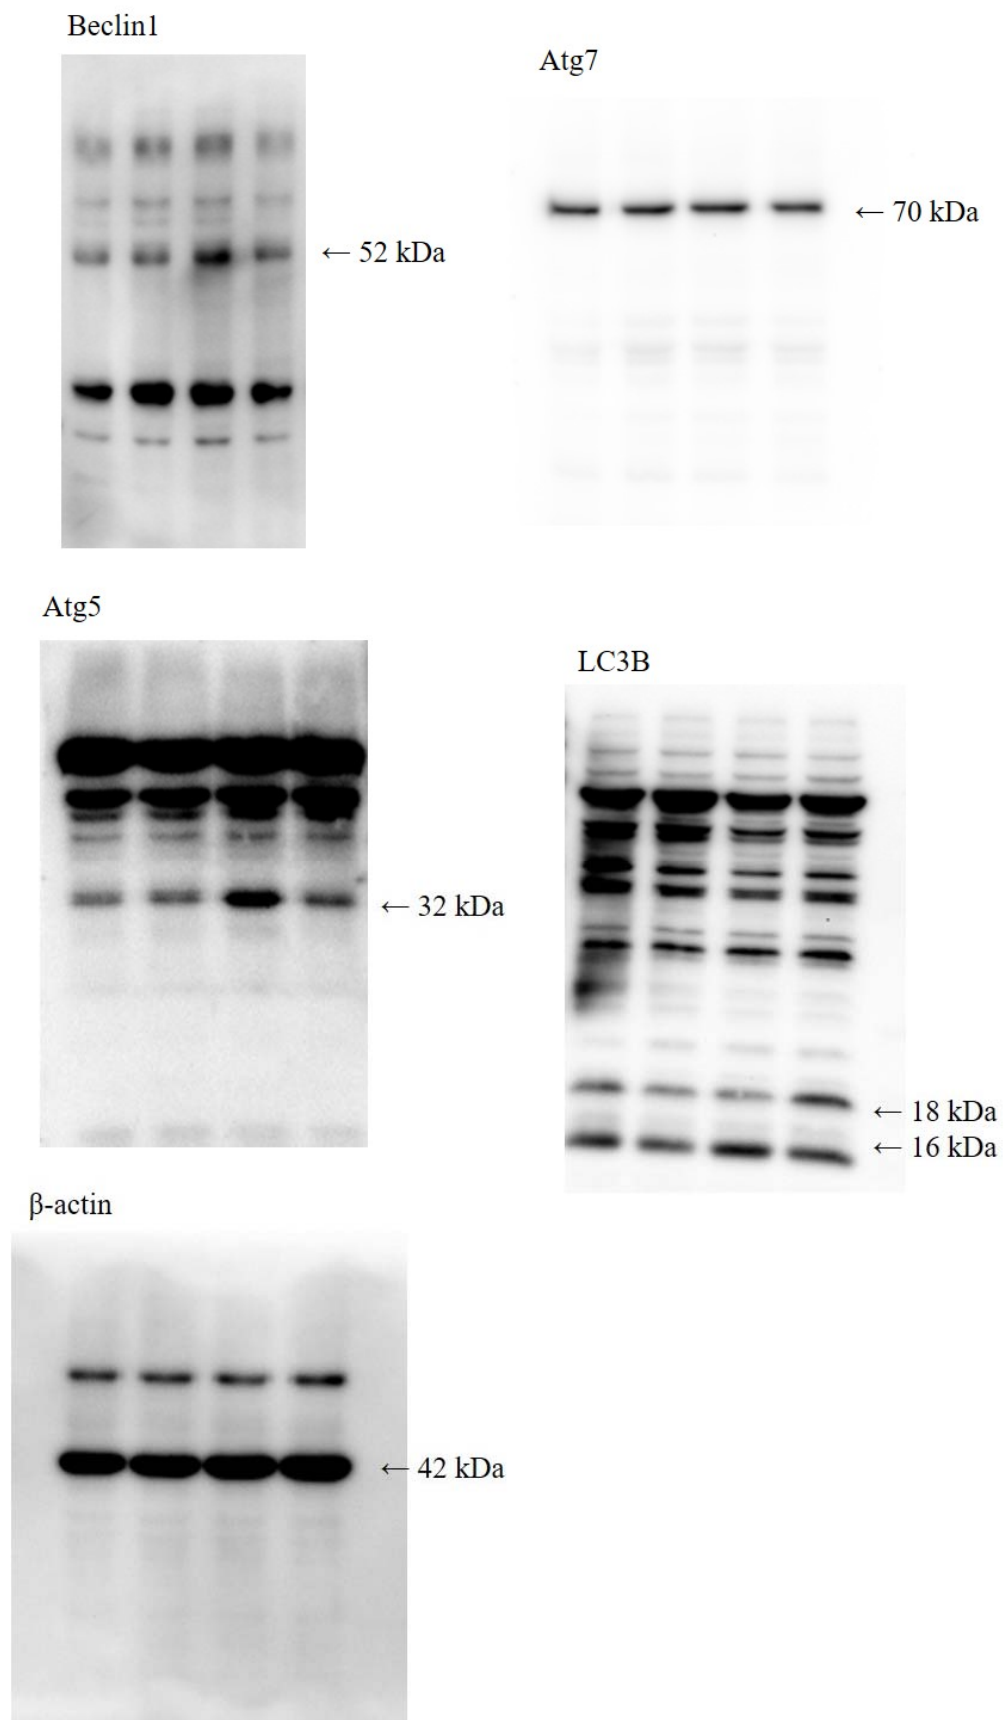

**Figure S6.** Western blot data. The full-length blots of Figure 8B.
